# Supplementary material for: An efficient and comprehensive plant glycerolipids analysis approach based on high‐performance liquid chromatography–quadrupole time‐of‐flight mass spectrometer
Source: PubMed Central journal article supplement (PMC6858605; doi:10.1002/pld3.183), 2019-11-15
Supplement: PLD3-3-e00183-s001.pdf [file PLD3-3-e00183-s001.pdf]

**TABLE S1.** Characteristic fragment  $m/z$  and identification fragmentation ions of different lipid classes under positive ion mode of ESI.

| <b>Lipid class</b> | <b>Precursor ion pattern (ESI<sup>+</sup>)</b> | <b>Characteristic fragment <math>m/z</math> (ESI<sup>+</sup>)</b> | <b>Identification fragmentation ion (ESI<sup>+</sup>)</b> |
|--------------------|------------------------------------------------|-------------------------------------------------------------------|-----------------------------------------------------------|
| TAG                | [M + NH <sub>4</sub> ] <sup>+</sup>            | -                                                                 | [M + NH <sub>4</sub> - R] <sup>+</sup>                    |
| DAG                | [M + NH <sub>4</sub> ] <sup>+</sup>            | -                                                                 | [M + NH <sub>4</sub> - R] <sup>+</sup>                    |
| PC                 | [M + H] <sup>+</sup>                           | PRC 184.07                                                        | [PRC + H] <sup>+</sup>                                    |
| PA                 | [M + NH <sub>4</sub> ] <sup>+</sup>            | NL 115.00                                                         | [M + NH <sub>4</sub> - NL] <sup>+</sup>                   |
| PE                 | [M + H] <sup>+</sup>                           | NL 141.02                                                         | [M + H - NL] <sup>+</sup>                                 |
| PG                 | [M + NH <sub>4</sub> ] <sup>+</sup>            | NL 189.04                                                         | [M + NH <sub>4</sub> - NL] <sup>+</sup>                   |
| PI                 | [M + NH <sub>4</sub> ] <sup>+</sup>            | NL 277.06                                                         | [M + NH <sub>4</sub> - NL] <sup>+</sup>                   |
| PS                 | [M + H] <sup>+</sup>                           | NL 185.01                                                         | [M + H - NL] <sup>+</sup>                                 |
| MGDG               | [M + NH <sub>4</sub> ] <sup>+</sup>            | NL 179.08                                                         | [M + NH <sub>4</sub> - NL] <sup>+</sup>                   |
| DGDG               | [M + NH <sub>4</sub> ] <sup>+</sup>            | NL 341.13                                                         | [M + NH <sub>4</sub> - NL] <sup>+</sup>                   |
| LysoPC             | [M + H] <sup>+</sup>                           | PRC 184.07                                                        | [M + H - RPC] <sup>+</sup>                                |
| LysoPE             | [M + H] <sup>+</sup>                           | NL 141.02                                                         | [M + H - NL] <sup>+</sup>                                 |
| LysoPG             | [M + H] <sup>+</sup>                           | NL 172.02                                                         | [M + H - NL] <sup>+</sup>                                 |

NL, neutral loss; R, any chain of multiple fatty acid chains; PRC, phosphorylated choline.
